# Supplementary material for: DNA threading intercalation of enantiopure [Ru(phen)2bidppz]2+induced by hydrophobic catalysis
Source: Royal Society of Chemistry journal article supplement (doi:10.1039/d0cp00845a), 2020-12-17
Supplement: d0cp00845a1.pdf [file d0cp00845a1.pdf]

## Supplementary Information

### DNA threading intercalation of enantiopure $[\text{Ru}(\text{phen})_2\text{bidppz}]^{2+}$ induced by hydrophobic catalysis

Bobo Feng<sup>a</sup>, Elin Sundin<sup>a</sup>, Per Lincoln<sup>a</sup> and Anna K. F. Mårtensson<sup>a,b\*</sup>

<sup>a</sup>Department of Chemistry and Chemical Engineering, Chalmers University of Technology, Kemigården 4, SE-412 96 Gothenburg, Sweden.

<sup>b</sup>Wallenberg Laboratory for Cardiovascular and Metabolic Research, Institute of Medicine, University of Gothenburg, Sahlgrenska University Hospital, Bruna Stråket 16, SE-413 45 Gothenburg, Sweden.

E-mail: [anna.martensson@wlab.gu.se](mailto:anna.martensson@wlab.gu.se)

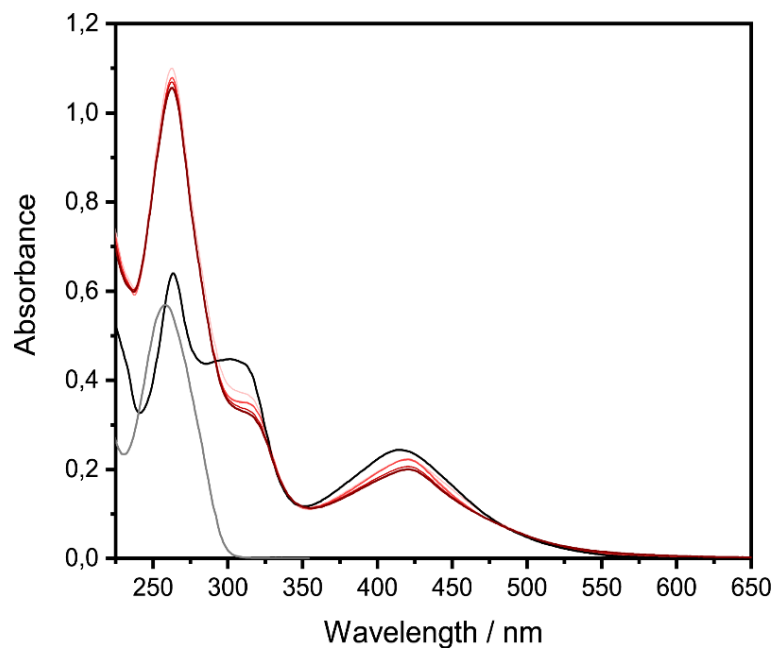

**Figure S1.** Absorption spectra of  $\Lambda$ -Ru-1 in the presence of ctDNA at [base pairs]/[complex] ratio 5 in 50 mM NaCl aqueous buffer solution with 20% (w/w) PEG-400. The color change from light to dark specify spectral change with time (0, 0.5, 1.5, 24 and 48 h; green) after 50°C incubation. The black line shows the complex without the addition of ctDNA. The gray line shows ctDNA alone. The concentration of ctDNA is 80  $\mu$ M nucleotides.

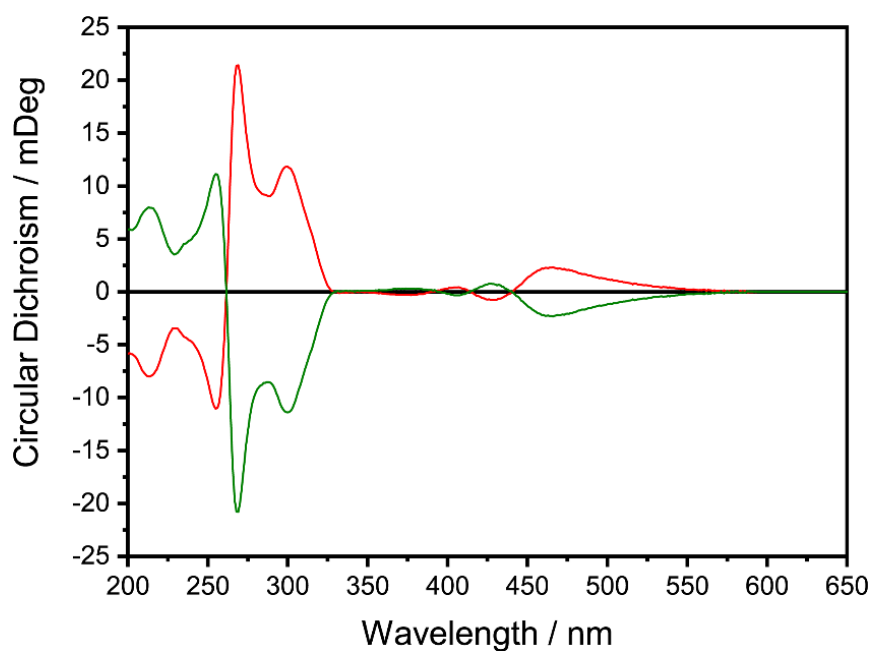

**Figure S2.** Circular dichroism spectra of the  $\Delta$  (green) and  $\Lambda$  (red) enantiomers of Ru-1 at a concentration of 4  $\mu$ M in 50 mM NaCl aqueous buffer solution.

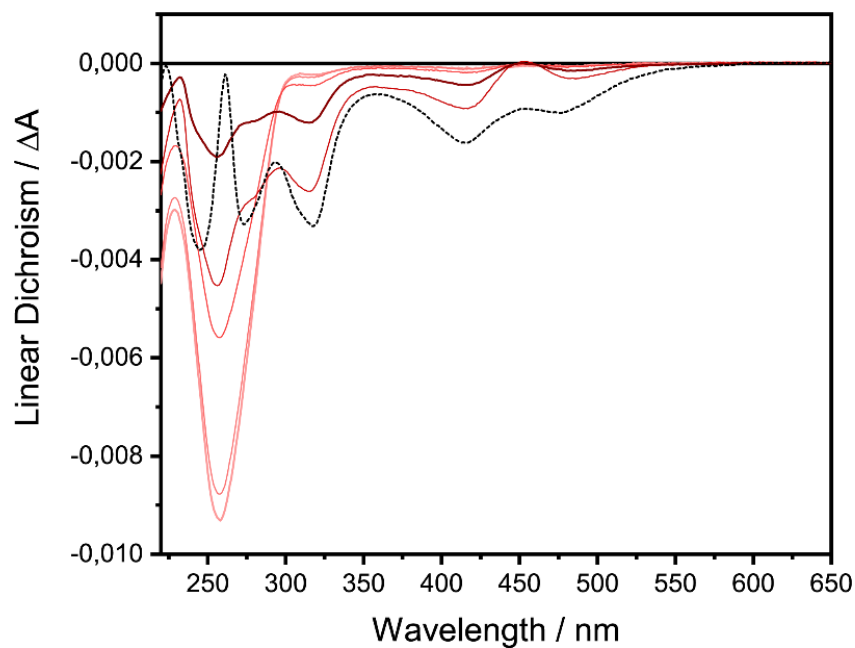

**Figure S3.** Linear dichroism spectra of  $\Lambda$ -Ru-1 (red) and  $\Lambda\Lambda$ -Ru-2 (dotted black, incubated 1 d at 50°C) in the presence of ctDNA at [base pairs]/[complex] ratio 5 in 50 mM NaCl aqueous buffer solution with 20% (w/w) PEG-400. The color change from light to dark specify spectral change for  $\Lambda$ -Ru-1 with time (0.5 h, 1.5 h, 1 d, 2 d, and 7 d) after 50°C incubation. The concentration of ctDNA is 150  $\mu$ M nucleotides.

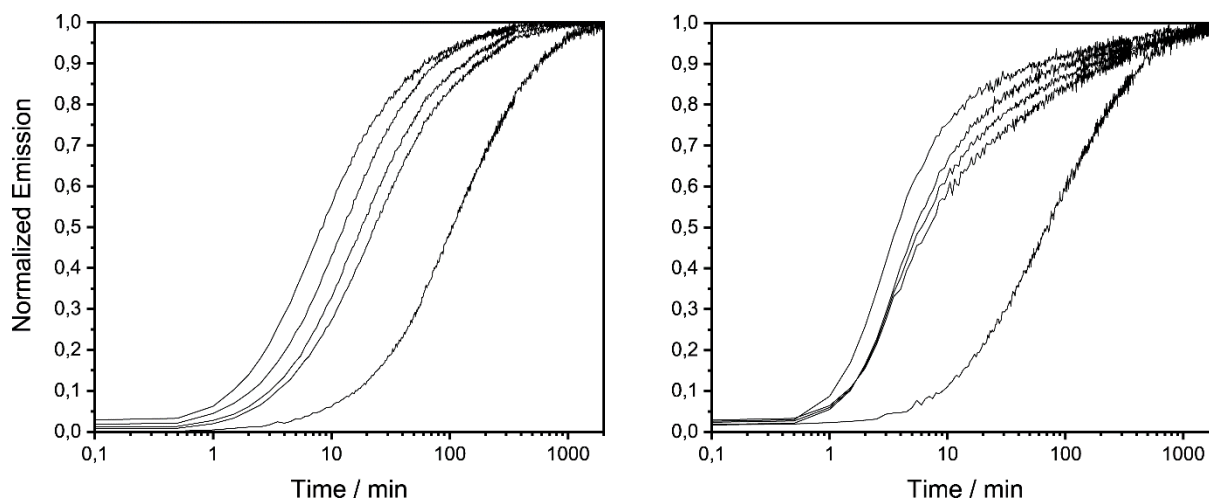

**Figure S4.** Association kinetics of  $\Delta\Delta$ - (left) and  $\Lambda\Lambda$ -Ru-2 (right) in the presence of ctDNA, measured at different concentrations of PEG-400. PEG-400 concentrations from left to right are 20, 15, 10, 5 and 0% (w/w). Measurements performed at 50°C in 50 mM NaCl. The concentrations of complex and ctDNA were 15  $\mu$ M and 150  $\mu$ M nucleotides, respectively.

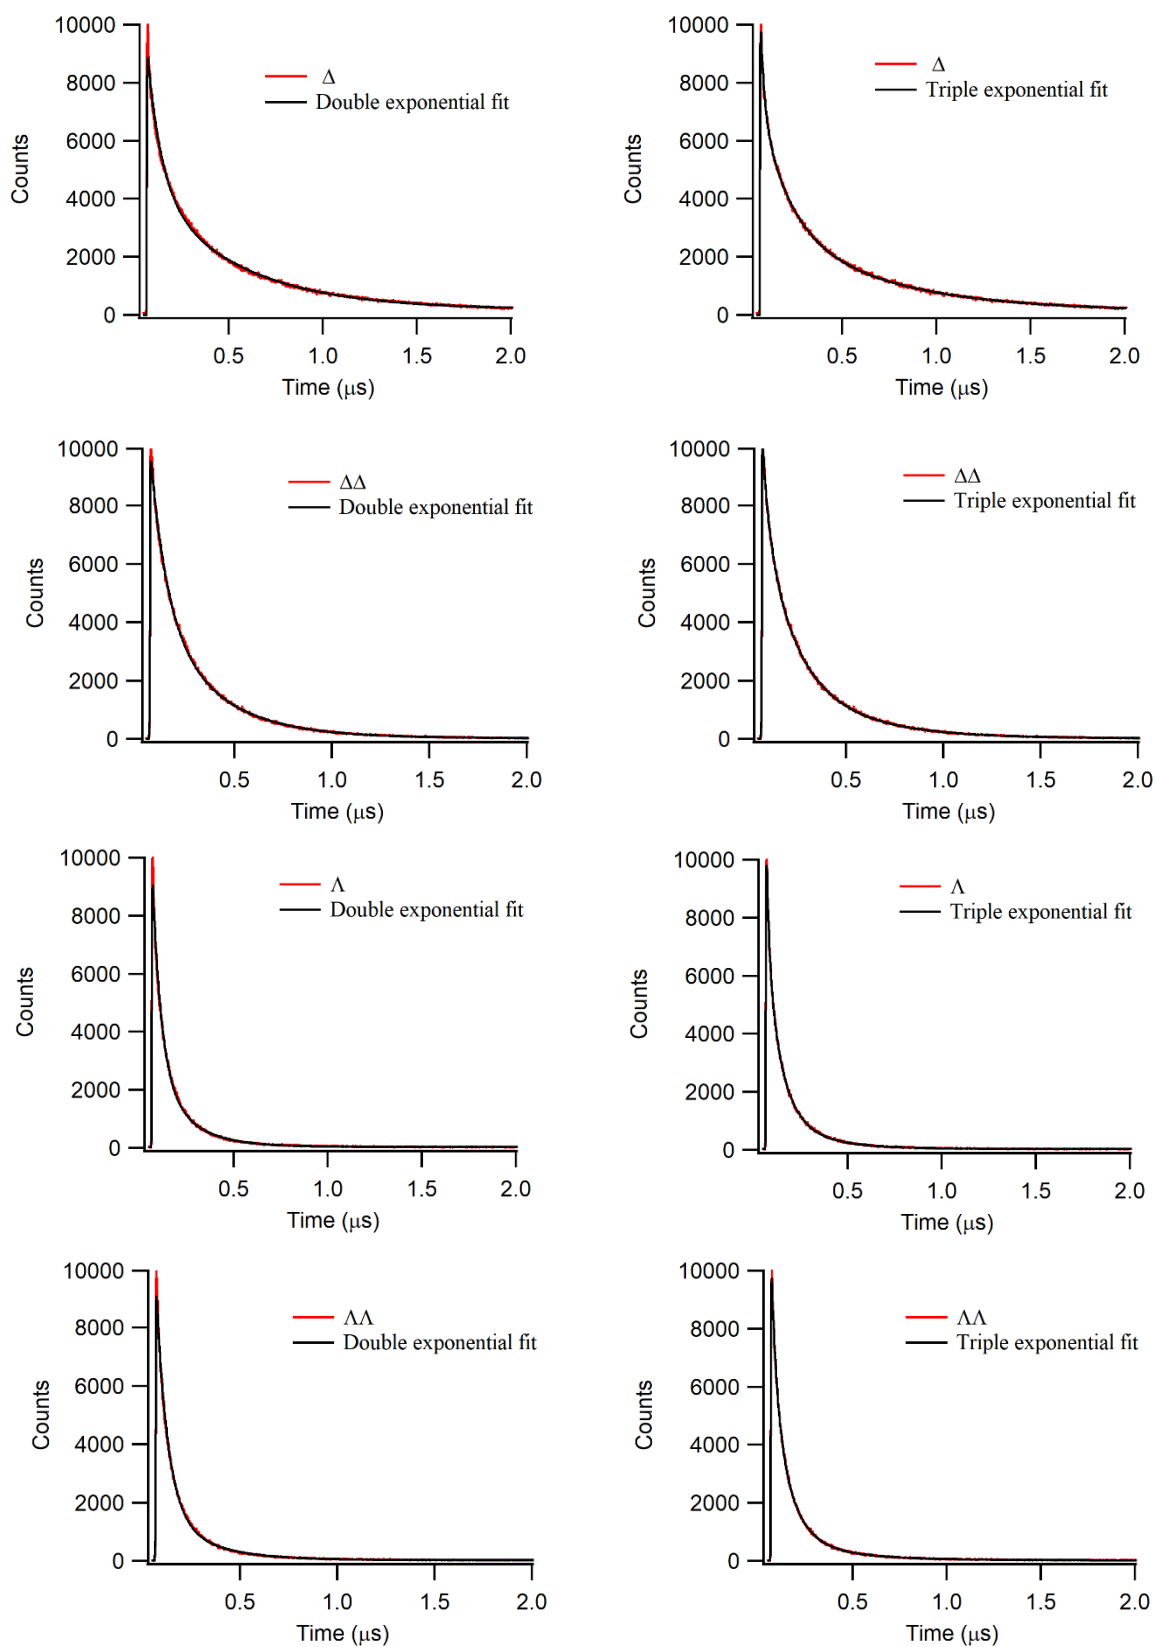

**Figure S5.** Excited state lifetime decay fittings curves for **Ru-1** and **Ru-2** enantiomers in the presence of ctDNA and 20% (w/w) PEG-400. The concentrations of complex and ctDNA were 15  $\mu\text{M}$  and 150  $\mu\text{M}$  nucleotides, respectively. Measurements were performed at room temperature in 50 mM NaCl.

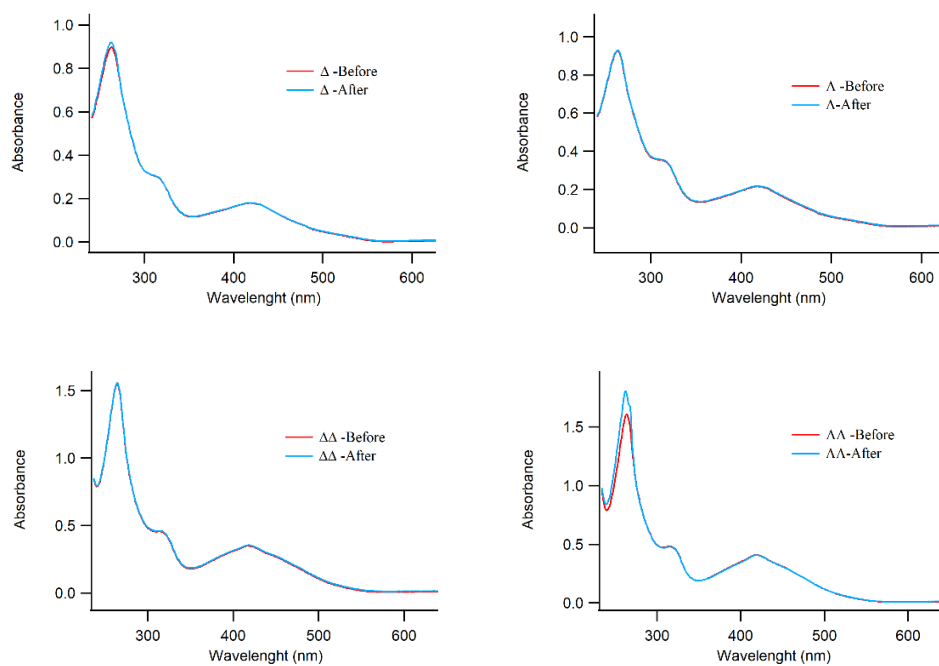

**Figure S6.** Absorption spectra of **Ru-1** and **Ru-2** enantiomers before (red) and after (blue) excited state lifetime measurements.

**Table S1.** Luminescence decay parameters for **Ru-1** and **Ru-2** enantiomers in the presence of ctDNA and 20% (w/w) PEG-400 using a triexponential fitting.

| Sample <sup>a</sup> | $\tau_1$ (ns) | $\alpha_1$ | $\tau_2$ (ns) | $\alpha_2$ | $\tau_3$ (ns) | $\alpha_3$ | $\tau_{\text{avg}}^b$ (ns) |
|---------------------|---------------|------------|---------------|------------|---------------|------------|----------------------------|
| <b>Δ-Ru-1</b>       | 587           | 0.29       | 145           | 0.38       | 19            | 0.33       | 232                        |
| <b>Λ-Ru-1</b>       | 227           | 0.12       | 77            | 0.50       | 16            | 0.38       | 72                         |
| <b>ΔΔ-Ru-2</b>      | 355           | 0.27       | 144           | 0.47       | 33            | 0.26       | 172                        |
| <b>ΛΛ-Ru-2</b>      | 303           | 0.08       | 90            | 0.52       | 26            | 0.40       | 81                         |

<sup>a</sup>150  $\mu\text{M}$  nucleotides and 15  $\mu\text{M}$  complex in 50 mM NaCl after 50°C incubation.

<sup>b</sup>The average emission lifetime calculated as  $\tau_{\text{avg}} = \alpha_1\tau_1 + \alpha_2\tau_2 + \alpha_3\tau_3$ .

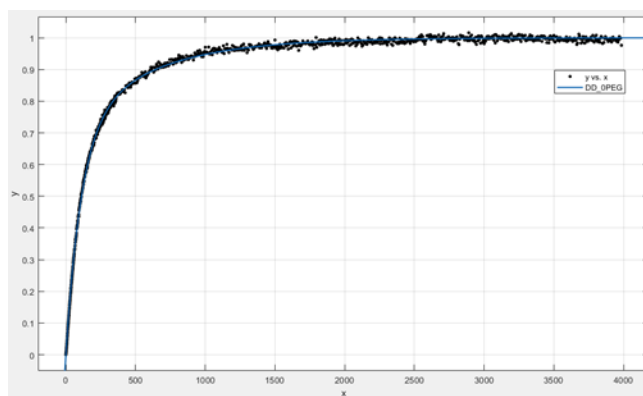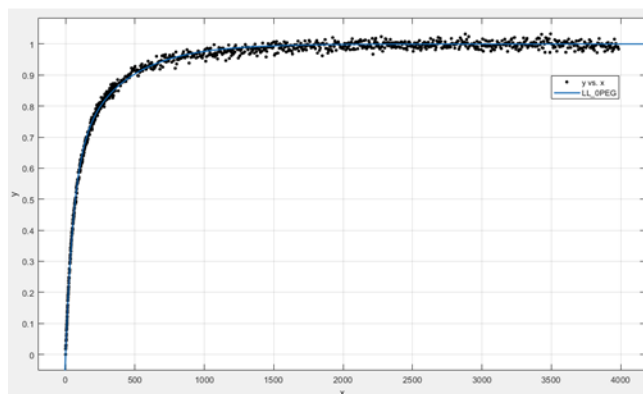

**Figure S7.** Fitting of biexponential model to association kinetic curves for  $\Delta\Delta$ - and  $\Lambda\Lambda$ -Ru-2 at 0% (w/w) PEG-400 concentration (visualized in MATLAB 2017B).

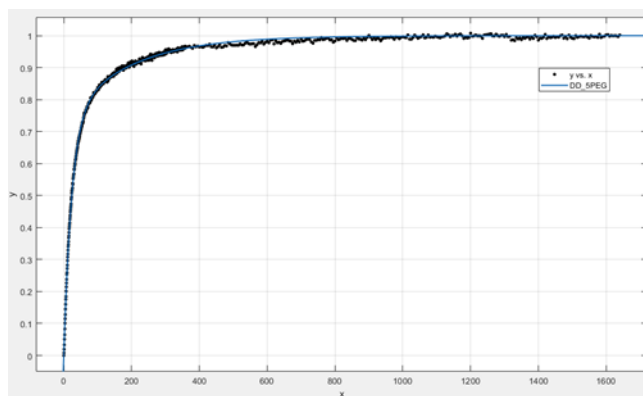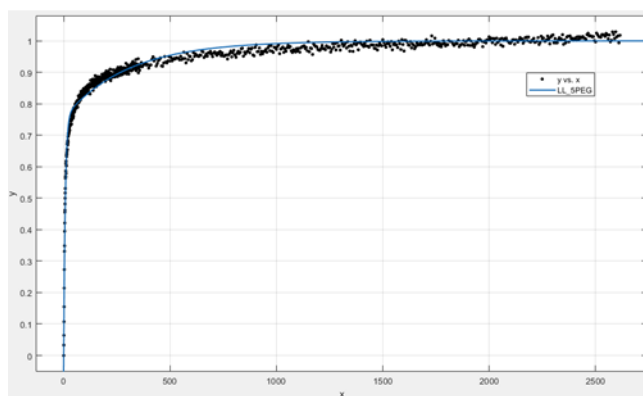

**Figure S8.** Fitting of biexponential model to association kinetic curves for  $\Delta\Delta$ - and  $\Lambda\Lambda$ -Ru-2 at 5% (w/w) PEG-400 concentration (visualized in MATLAB 2017B).

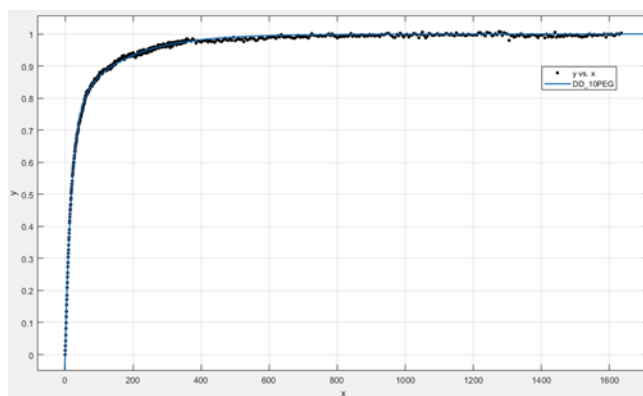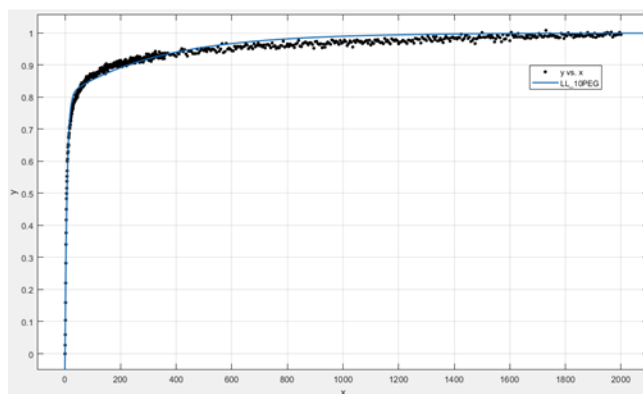

**Figure S9.** Fitting of biexponential model to association kinetic curves for  $\Delta\Delta$ - and  $\Lambda\Lambda$ -Ru-2 at 10% (w/w) PEG-400 concentration (visualized in MATLAB 2017B).

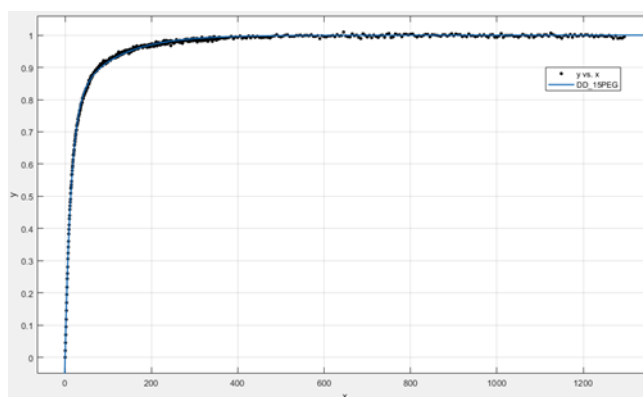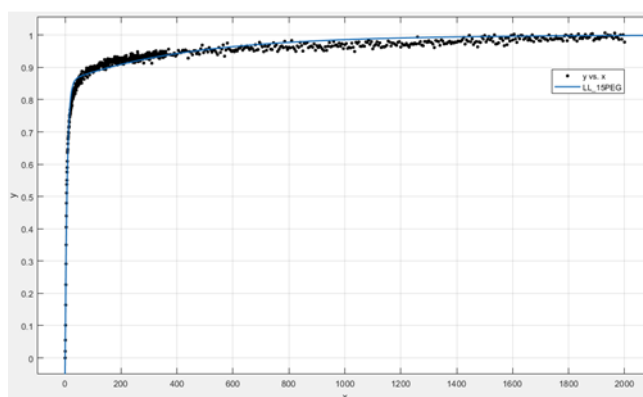

**Figure S10.** Fitting of biexponential model to association kinetic curves for  $\Delta\Delta$ - and  $\Lambda\Lambda$ -Ru-2 at 15% (w/w) PEG-400 concentration (visualized in MATLAB 2017B).

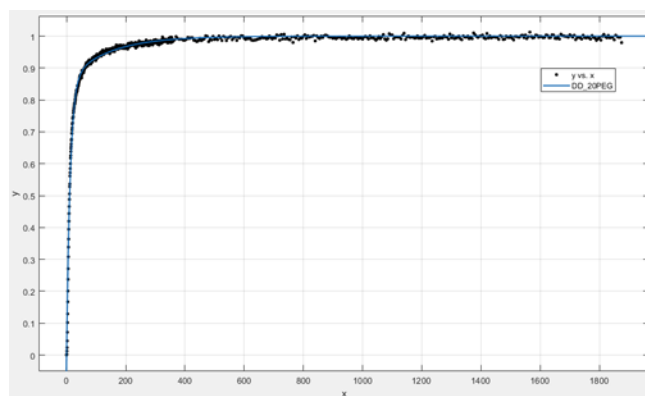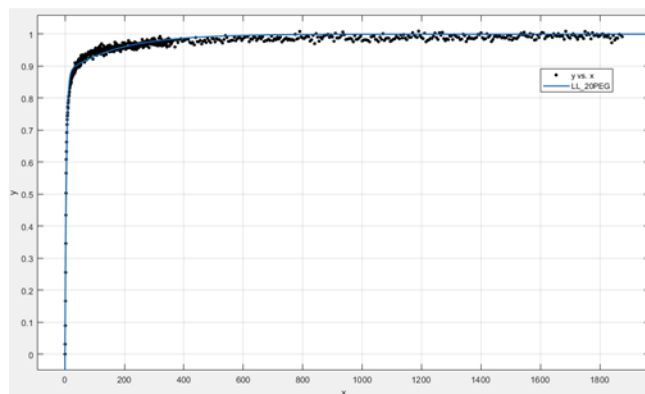

**Figure S11.** Fitting of biexponential model to association kinetic curves for  $\Delta\Delta$ - and  $\Lambda\Lambda$ -Ru-2 at 20% (w/w) PEG-400 concentration (visualized in MATLAB 2017B).

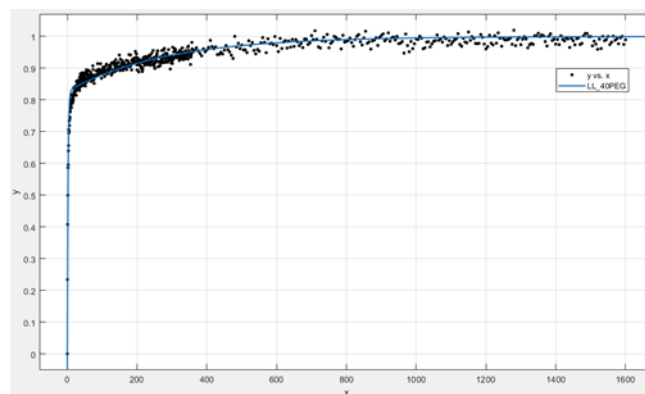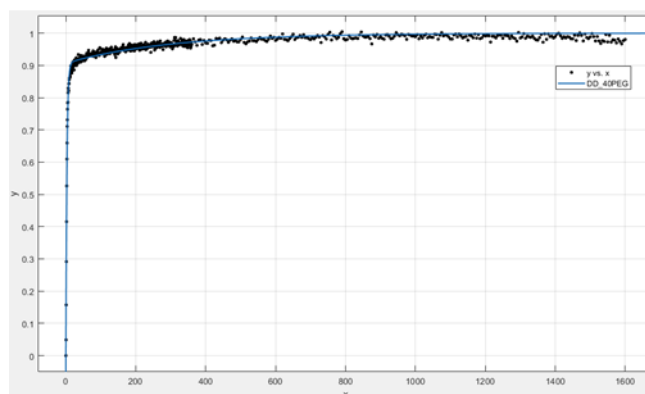

**Figure S12.** Fitting of biexponential model to association kinetic curves for  $\Delta\Delta$ - and  $\Lambda\Lambda$ -Ru-2 at 40% (w/w) PEG-400 concentration (visualized in MATLAB 2017B).



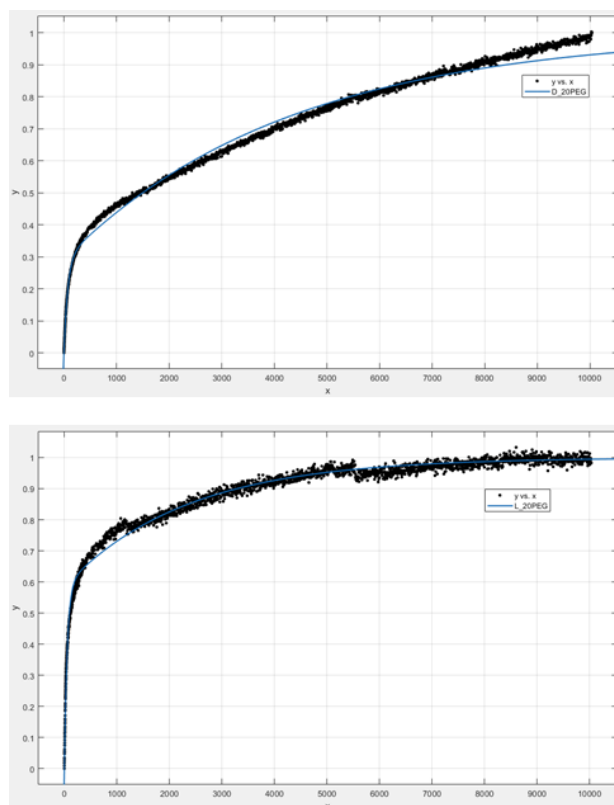

**Figure S13.** Fitting of biexponential model to association kinetic curves for  $\Delta$ - and  $\Lambda$ -Ru-1 at 20% (w/w) PEG-400 concentration (visualized in MATLAB 2017B).

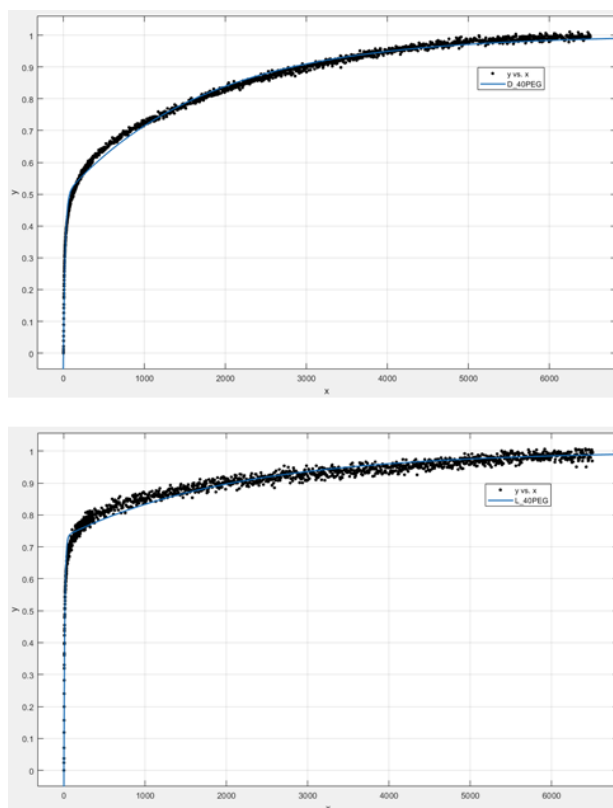

**Figure S14.** Fitting of biexponential model to association kinetic curves for  $\Delta$ - and  $\Lambda$ -Ru-1 at 40% (w/w) PEG-400 concentration (visualized in MATLAB 2017B).

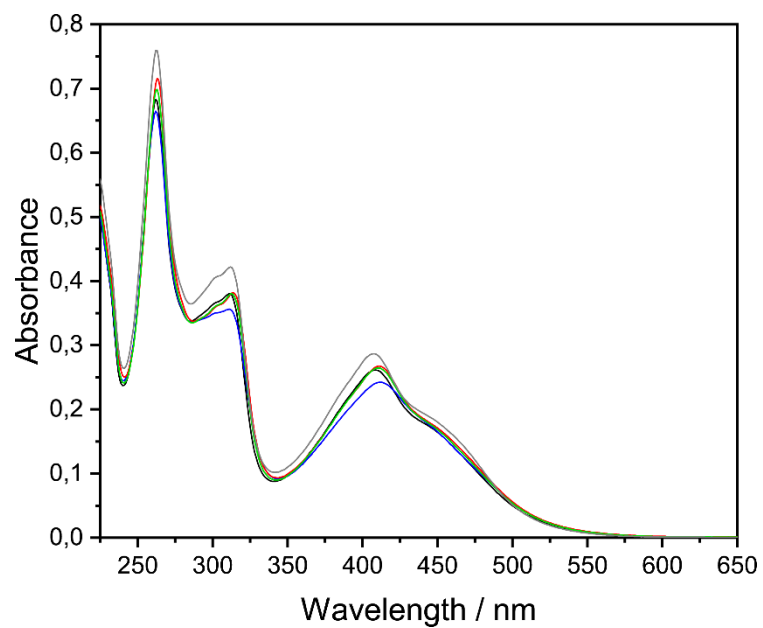

**Figure S15.** Absorption spectra of  $\Delta\Delta$ -Ru-2 ( $\sim 4 \mu\text{M}$ ) in different solvents: MeOH/H<sub>2</sub>O (1:1) (gray), 40% (w/w) PEG-400 + 50 mM NaCl buffer (red), MilliQ-pure water (black), 15% (w/w) PEG-400 + 50 mM NaCl buffer (green), 50 mM NaCl buffer (blue). All measurements were performed in room-temperature.
